# Supplementary material for: Beyond Monetary Cost-Benefit Analyses: Combining Economic, Environmental and Social Analyses of Short Rotation Coppice Poplar Production in Slovakia
Source: MDPI journal article supplement (doi:10.3390/f13020349), 2022-02-19
Supplement: s1 [file s1]

# Beyond monetary Cost-Benefit Analyses: Combining Economic, Environmental and Social Analyses of Short Rotation Coppice Poplar Production in Slovakia

Daniela Fürtner <sup>1,\*</sup>, Enrique Alejandro Perdomo Echenique <sup>2</sup>, Stefan J. Hörtenhuber <sup>3</sup>, Peter Schwarzbauer <sup>1</sup> and Franziska Hesser <sup>2</sup>

<sup>1</sup> Institute of Marketing and Innovation, Department of Economics and Social Sciences, University of Natural Resources and Life Sciences Vienna, Feistmantelstraße 4, 1180 Vienna, Austria;

peter.schwarzbauer@boku.ac.at (P.S.)

<sup>2</sup> Wood K Plus—Competence Center for Wood Composites and Wood Chemistry, Kompetenzzentrum Holz GmbH, Altenberger Straße 69, 4040 Linz, Austria; e.perdomoechenique@wood-kplus.at (E.A.P.E.); f.hesser@wood-kplus.at (F.H.)

<sup>3</sup> Division of Livestock Sciences (NUWI), Department of Sustainable Agricultural Systems, University of Natural Resources and Life Sciences Vienna, Gregor-Mendel-Straße 33, 1180 Vienna, Austria;

stefan.hoertenhuber@boku.ac.at (S.J.H.)

\* Correspondence: daniela.fuertner@boku.ac.at (D.F.)

**Citation:** Fürtner, D.; Perdomo E., E.A.; Hörtenhuber, S.J.; Schwarzbauer, P.; Hesser, F. Beyond Monetary Cost-Benefit Analyses: Combining Economic, Environmental and Social Analyses of Short Rotation Coppice Poplar Production in Slovakia. *Forests* **2022**, *13*, 349. <https://doi.org/10.3390/f13020349>

Academic Editor: Paula Soares

Received: 22 December 2021

Accepted: 15 February 2022

Published: 19 February 2022

**Publisher's Note:** MDPI stays neutral with regard to jurisdictional claims in published maps and institutional affiliations.

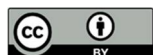

**Copyright:** © 2022 by the authors. Submitted for possible open access publication under the terms and conditions of the Creative Commons Attribution (CC BY) license (<https://creativecommons.org/licenses/by/4.0/>).

**Table S1.** Data and costs of poplar SRC Production assumed for the analyses.

| <i>Item/Operation</i>                                                           | <i>Unit</i>                     | <i>Value</i>                                 | <i>Year of operation</i>             | <i>Data source</i>                                                                                                                                                                                                     | <i>Notes</i>                                                                                                  |
|---------------------------------------------------------------------------------|---------------------------------|----------------------------------------------|--------------------------------------|------------------------------------------------------------------------------------------------------------------------------------------------------------------------------------------------------------------------|---------------------------------------------------------------------------------------------------------------|
| <b>Land Agreement</b>                                                           | euros<br>ha <sup>-1</sup>       | 190.00                                       | 1 – 20                               | Average 0 - 100 km Land Calculator project Dendromass4Europe ( <a href="https://dendromass4europe.eu/calculator/de/">https://dendromass4europe.eu/calculator/de/</a> ) verified by Interview (SRC Manager), April 2021 |                                                                                                               |
| <b>Overhead</b>                                                                 | euros<br>ha <sup>-1</sup>       | 150.00                                       | 1 – 20                               | Average from [1-3] verified by Interview (SRC Manager), April 2021                                                                                                                                                     |                                                                                                               |
| <b>Land Pre-Preparation (grass cutting, mulching, heavy disking, ploughing)</b> | euros<br>ha <sup>-1</sup>       | 100.00                                       | 1                                    | Average from [1-6] verified by Interview (SRC Manager), April 2021                                                                                                                                                     |                                                                                                               |
| <b>Land Final-Preparation (harrowing)</b>                                       | euros<br>ha <sup>-1</sup>       | 40.00                                        | 1                                    | Average from [1-6] verified by Interview (SRC Manager), April 2021                                                                                                                                                     |                                                                                                               |
| <b>Poplar cuttings</b>                                                          | euros c<br>utting <sup>-1</sup> | 1.00                                         | 1                                    | Mean of Max 1, 3, 4 clones from the LignoPlant Webshop: <a href="https://www.lignoplant.com">https://www.lignoplant.com</a>                                                                                            |                                                                                                               |
| <b>Transport of cuttings</b>                                                    | euros<br>ha <sup>-1</sup>       | 300.00                                       | 1                                    | LignoPlant Webshop: <a href="https://www.lignoplant.com">https://www.lignoplant.com</a>                                                                                                                                |                                                                                                               |
| <b>Planting</b>                                                                 | euros<br>ha <sup>-1</sup>       | 500.00                                       | 1                                    | Average from [1-6] verified by Interview (SRC Manager), April 2021                                                                                                                                                     |                                                                                                               |
| <b>Maintenance (mechanical weed control)</b>                                    | euros<br>ha <sup>-1</sup>       | 80.00 <sup>a</sup> ;<br>40.00 <sup>b</sup>   | 1 – 3; 6 – 8; 11<br>– 13;<br>16 – 18 | Average from [1-3] verified by Interview (SRC Manager), April 2021                                                                                                                                                     |                                                                                                               |
| <b>Fencing</b>                                                                  | euros<br>ha <sup>-1</sup>       | 20.00                                        | N/A                                  | Average [2] verified by Interview (SRC Manager), April 2021                                                                                                                                                            | Operation broken down on an annual average as fencing is only applied on fields required (due to game damage) |
| <b>Singling/Pruning</b>                                                         | euros<br>ha <sup>-1</sup>       | 60.00 <sup>c</sup> ;<br>40.00 <sup>d</sup>   | 2; 3; 6; 7; 11;<br>12; 16; 17        | Average verified by Interview (SRC Manager), April 2021                                                                                                                                                                |                                                                                                               |
| <b>Full-stem harvesting</b>                                                     | euros<br>ha <sup>-1</sup>       | 276.00 <sup>e</sup> ;<br>331.20 <sup>f</sup> | 5; 10; 15; 20                        | [7]                                                                                                                                                                                                                    | Price increase for the 2 <sup>nd</sup> to 4 <sup>th</sup> harvesting season due to estimated yield increase   |

|                                               |                            |          |               |                                                                               |                                                  |
|-----------------------------------------------|----------------------------|----------|---------------|-------------------------------------------------------------------------------|--------------------------------------------------|
| <b>Log transport to plant (wood industry)</b> | euros<br>bdt <sup>-1</sup> | 15.70    | 5; 10; 15; 20 | Average verified by Interview (SRC Manager), April 2021                       | Average transportation distance of 90 km assumed |
| <b>Land reconversion</b>                      | euros<br>ha <sup>-1</sup>  | 1,200.00 | 20            | Average from [1-4]                                                            |                                                  |
| <b>EU field subsidies</b>                     | euros<br>ha <sup>-1</sup>  | 180.00   | 1 – 20        | Interview (SRC Manager), April 2021                                           | Subsidies for agricultural crop production       |
| <b>Poplar timber</b>                          | euros<br>bdt <sup>-1</sup> | 86.06    | 5; 10; 15; 20 | UNECE Export unit values, non-coniferous industrial roundwood poplar; SK 2018 | Assumed market value                             |

<sup>a</sup> in the 1<sup>st</sup>, 6<sup>th</sup>, 11<sup>th</sup> and 16<sup>th</sup> year; <sup>b</sup> in the 2<sup>nd</sup>, 3<sup>rd</sup>, 7<sup>th</sup>, 8<sup>th</sup>, 12<sup>th</sup>, 13<sup>th</sup>, 17<sup>th</sup>, 18<sup>th</sup> year; <sup>c</sup> in the 2<sup>nd</sup>, 6<sup>th</sup>, 11<sup>th</sup>, 16<sup>th</sup> year; <sup>d</sup> in the 3<sup>rd</sup>, 7<sup>th</sup>, 12<sup>th</sup>, 17<sup>th</sup> year; <sup>e</sup> in the 5<sup>th</sup> year; <sup>f</sup> in the 10<sup>th</sup>, 15<sup>th</sup>, 20<sup>th</sup> year;

**Table S2.** Data and costs of corn maize production assumed for the analyses.

| <i>Item/Operation</i>                                                          | <i>Unit</i>        | <i>Value</i> | <i>Year of operation</i> | <i>Data source</i>                            | <i>Notes</i>                                |
|--------------------------------------------------------------------------------|--------------------|--------------|--------------------------|-----------------------------------------------|---------------------------------------------|
| <b>Land rent</b>                                                               | € ha <sup>-1</sup> | 50.26        | 1 – 20                   | Average rental price agricultural land SK [8] |                                             |
| <b>Land pre-preparation (deep grubbing)</b>                                    | € ha <sup>-1</sup> | 21.41        | 1 – 20                   | KTBL Calculator <sup>1</sup>                  |                                             |
| <b>Manure spreading</b>                                                        | € ha <sup>-1</sup> | 47.05        | 1 – 20                   | KTBL Calculator <sup>1</sup>                  |                                             |
| <b>Land final-preparation (harrowing)</b>                                      | € ha <sup>-1</sup> | 22.38        | 1 – 20                   | KTBL Calculator <sup>1</sup>                  |                                             |
| <b>Fertilizer (Diammon Phosphate, 18 % N, 46 % P<sub>2</sub>O<sub>5</sub>)</b> | € ha <sup>-1</sup> | 33.60        | 1 – 20                   | KTBL Calculator                               | 80 kg ha <sup>-1</sup>                      |
| <b>Fertilizing</b>                                                             | € ha <sup>-1</sup> | 1.75         | 1 – 20                   | KTBL Calculator <sup>1</sup>                  |                                             |
| <b>Corn (hybrid seeds)</b>                                                     | € ha <sup>-1</sup> | 220.00       | 1 – 20                   | KTBL Calculator                               | 2 U ha <sup>-1</sup>                        |
| <b>Precision seeding</b>                                                       | € ha <sup>-1</sup> | 32.24        | 1 – 20                   | KTBL Calculator <sup>1</sup>                  |                                             |
| <b>Water</b>                                                                   | € ha <sup>-1</sup> | 1.08         | 1 – 20                   | KTBL Calculator                               | 0,6 m <sup>3</sup> ha <sup>-1</sup>         |
| <b>Water transport</b>                                                         | € ha <sup>-1</sup> | 2.33         | 1 – 20                   | KTBL Calculator <sup>1</sup>                  |                                             |
| <b>Herbicide (Intensity Level 1)</b>                                           | € ha <sup>-1</sup> | 82.70        | 1 – 20                   | KTBL Calculator                               |                                             |
| <b>Herbicide application</b>                                                   | € ha <sup>-1</sup> | 10.82        | 1 – 20                   | KTBL Calculator <sup>1</sup>                  |                                             |
| <b>Recording weeds</b>                                                         | € ha <sup>-1</sup> | 0.54         | 1 – 20                   | KTBL Calculator <sup>1</sup>                  |                                             |
| <b>Fertilizer (Calcium Ammonium Nitrate, 27 % N)</b>                           | € ha <sup>-1</sup> | 32.20        | 1 – 20                   | KTBL Calculator                               | 140 kg ha <sup>-1</sup>                     |
| <b>Fertilizing</b>                                                             | € ha <sup>-1</sup> | 2.05         | 1 – 20                   | KTBL Calculator <sup>1</sup>                  |                                             |
| <b>Harvesting</b>                                                              | € ha <sup>-1</sup> | 122.91       | 1 – 20                   | KTBL Calculator <sup>1</sup>                  | Combine harvester 300 kW                    |
| <b>Corn transport</b>                                                          | € ha <sup>-1</sup> | 13.89        | 1 – 20                   | KTBL Calculator <sup>1</sup>                  |                                             |
| <b>Storage and drying</b>                                                      | € ha <sup>-1</sup> | 216.46       | 1 – 20                   | KTBL Calculator <sup>1</sup>                  |                                             |
| <b>Fertilizer (Calcium Carbonate)</b>                                          | € ha <sup>-1</sup> | 40.70        | 1 – 20                   | KTBL Calculator                               | 1 t ha <sup>-1</sup>                        |
| <b>Calcium Carbonate spreading</b>                                             | € ha <sup>-1</sup> | 2.51         | 1 – 20                   | KTBL Calculator <sup>1</sup>                  |                                             |
| <b>Land recultivation (grubbing)</b>                                           | € ha <sup>-1</sup> | 14.77        | 1 – 20                   | KTBL Calculator <sup>1</sup>                  |                                             |
| <b>Insurance (hail)</b>                                                        | € ha <sup>-1</sup> | 8.94         | 1 – 20                   | KTBL Calculator                               | 1,210.00 € ha <sup>-1</sup>                 |
| <b>Services</b>                                                                | € ha <sup>-1</sup> | 1.80         | 1 – 20                   | KTBL Calculator <sup>1</sup>                  |                                             |
| <b>Labour costs fixed</b>                                                      | € ha <sup>-1</sup> | 61.82        | 1 – 20                   | KTBL Calculator <sup>2</sup>                  | 4.6 man-hours ha <sup>-1</sup> <sub>1</sub> |
| <b>EU field subsidies for agricultural crop production</b>                     | € ha <sup>-1</sup> | 180.00       | 1 – 20                   | Interview (SRC Manager), April 2021           |                                             |
| <b>Corn maize</b>                                                              | € t <sup>-1</sup>  | 240.25       | 1 – 20                   | Maize stock market prize, November 2021       | Assumed market value                        |

<sup>1</sup> price adjusted according to the EUROSTAT 2020 price level indices for consumer goods and services (Germany - Slovakia); <sup>2</sup> price adjusted according to OECD Average annual wages (2020), wage difference of 36 % (Germany - Slovakia) [9];

Table S3. Data and costs of winter rye production assumed for the analyses.

| <i>Item/Operation</i>                                                                                           | <i>Unit</i>        | <i>Value</i> | <i>Year of operation</i> | <i>Data source</i>                            | <i>Notes</i>                        |
|-----------------------------------------------------------------------------------------------------------------|--------------------|--------------|--------------------------|-----------------------------------------------|-------------------------------------|
| Land rent                                                                                                       | € ha <sup>-1</sup> | 50.26        | 1 – 20                   | Average rental price agricultural land SK [8] |                                     |
| Land pre-preparation (deep grubbing)                                                                            | € ha <sup>-1</sup> | 21.41        | 1 – 20                   | KTBL Calculator <sup>1</sup>                  |                                     |
| Phosphorus Potassium fertilizer (Diammon Phosphate, 18 % P <sub>2</sub> O <sub>5</sub> , 10 % K <sub>2</sub> O) | € ha <sup>-1</sup> | 44.00        | 1 – 20                   | KTBL Calculator                               | 220 kg ha <sup>-1</sup>             |
| Fertilizing                                                                                                     | € ha <sup>-1</sup> | 2.59         | 1 – 20                   | KTBL Calculator <sup>1</sup>                  |                                     |
| Winter Rye Z-seeds                                                                                              | € ha <sup>-1</sup> | 63.60        | 1 – 20                   | KTBL Calculator                               | 120 kg ha <sup>-1</sup>             |
| Transport of seeds                                                                                              | € ha <sup>-1</sup> | 1.37         | 1 – 20                   | KTBL Calculator <sup>1</sup>                  |                                     |
| Sowing                                                                                                          | € ha <sup>-1</sup> | 31.17        | 1 – 20                   | KTBL Calculator <sup>1</sup>                  | Rotary Harrows and Precision Seeder |
| Recording weeds                                                                                                 | € ha <sup>-1</sup> | 0.54         | 1 – 20                   | KTBL Calculator <sup>1</sup>                  |                                     |
| Water                                                                                                           | € ha <sup>-1</sup> | 1.08         | 1 – 20                   | KTBL Calculator                               | 0,6 m <sup>3</sup> ha <sup>-1</sup> |
| Water transport                                                                                                 | € ha <sup>-1</sup> | 2.33         | 1 – 20                   | KTBL Calculator <sup>1</sup>                  |                                     |
| Herbicide (Intensity Level 1)                                                                                   | € ha <sup>-1</sup> | 42.60        | 1 – 20                   | KTBL Calculator                               |                                     |
| Growth Regulator (Intensity Level 1)                                                                            | € ha <sup>-1</sup> | 11.90        | 1 – 20                   | KTBL Calculator                               |                                     |
| Herbicide application                                                                                           | € ha <sup>-1</sup> | 5.41         | 1 – 20                   | KTBL Calculator <sup>1</sup>                  |                                     |
| Fertilizer (Calcium Ammonium Nitrate, 27 % N)                                                                   | € ha <sup>-1</sup> | 50.60        | 1 – 20                   | KTBL Calculator                               | 220 kg ha <sup>-1</sup>             |
| Fertilizing                                                                                                     | € ha <sup>-1</sup> | 3.80         | 1 – 20                   | KTBL Calculator <sup>1</sup>                  |                                     |
| Fungicide (Intensity Level 1)                                                                                   | € ha <sup>-1</sup> | 36.50        | 1 – 20                   | KTBL Calculator                               |                                     |
| Fungicide application                                                                                           | € ha <sup>-1</sup> | 5.41         | 1 – 20                   | KTBL Calculator                               |                                     |
| Harvesting                                                                                                      | € ha <sup>-1</sup> | 83.44        | 1 – 20                   | KTBL Calculator <sup>1</sup>                  | Combine harvester 300 kW            |
| Corn transport                                                                                                  | € ha <sup>-1</sup> | 6.37         | 1 – 20                   | KTBL Calculator <sup>1</sup>                  |                                     |
| Storage and drying                                                                                              | € ha <sup>-1</sup> | 47.94        | 1 – 20                   | KTBL Calculator <sup>1</sup>                  |                                     |
| Fertilizer (Calcium Carbonate)                                                                                  | € ha <sup>-1</sup> | 40.70        | 1 – 20                   | KTBL Calculator                               | 1 t ha <sup>-1</sup>                |
| Calcium Carbonate spreading                                                                                     | € ha <sup>-1</sup> | 2.95         | 1 – 20                   | KTBL Calculator <sup>1</sup>                  |                                     |
| Land recultivation (grubbing, flat)                                                                             | € ha <sup>-1</sup> | 14.77        | 1 – 20                   | KTBL Calculator <sup>1</sup>                  |                                     |
| Land recultivation (grubbing, deep)                                                                             | € ha <sup>-1</sup> | 15.86        | 1 – 20                   | KTBL Calculator <sup>1</sup>                  |                                     |
| Insurance (hail)                                                                                                | € ha <sup>-1</sup> | 4.52         | 1 – 20                   | KTBL Calculator                               | 550.00 € ha <sup>-1</sup>           |
| Services                                                                                                        | € ha <sup>-1</sup> | 0.98         | 1 – 20                   | KTBL Calculator <sup>1</sup>                  |                                     |
| Labor costs fixed                                                                                               | € ha <sup>-1</sup> | 26.88        | 1 – 20                   | KTBL Calculator <sup>2</sup>                  | 2.0 man hours ha <sup>-1</sup>      |
| EU field subsidies for agricultural crop production                                                             | € ha <sup>-1</sup> | 180.00       | 1 – 20                   | Interview (SRC Manager), April 2021           |                                     |
| Winter rye                                                                                                      | € t <sup>-1</sup>  | 293.75       | 1 – 20                   | Wheat stock market prize, November 2021       | Assumed market value                |

<sup>1</sup> price adjusted according to the EUROSTAT 2020 price level indices for consumer goods and services (Germany - Slovakia); <sup>2</sup> price adjusted according to OECD Average annual wages (2020), wage difference of 36 % (Germany - Slovakia) [9];

**Table S4.** Climate data used for Carbon turnover model (Source: Experimental data).

| Date    | Average Mean Temperature<br>(°C) | Average Mean Precipitation<br>(mm) | Average Mean ETP Penman-Monteith<br>(mm) |
|---------|----------------------------------|------------------------------------|------------------------------------------|
| May 18  | 20.400                           | 1.000                              | 4.107                                    |
| June 18 | 20.070                           | 1.073                              | 4.039                                    |
| July 18 | 20.955                           | 1.239                              | 4.002                                    |
| Aug. 18 | 22.610                           | 1.058                              | 3.751                                    |
| Sep. 18 | 16.037                           | 3.567                              | 2.024                                    |
| Oct. 18 | 12.042                           | 0.406                              | 0.924                                    |
| Nov. 18 | 9.020                            | 0.473                              | 0.341                                    |
| Dec. 18 | 1.340                            | 1.213                              | 0.090                                    |
| Jan. 19 | 0.171                            | 1.516                              | 0.437                                    |
| Feb. 19 | 2.432                            | 0.636                              | 0.367                                    |
| Mar. 19 | 7.174                            | 0.761                              | 0.973                                    |
| Apr. 19 | 11.483                           | 0.793                              | 2.307                                    |
| May 19  | 12.229                           | 4.168                              | 2.298                                    |
| June 19 | 22.023                           | 1.067                              | 4.568                                    |
| July 19 | 20.361                           | 1.129                              | 3.787                                    |
| Aug. 19 | 21.174                           | 1.697                              | 3.250                                    |
| Sep. 19 | 15.020                           | 1.727                              | 1.834                                    |
| Oct. 19 | 10.868                           | 0.929                              | 0.688                                    |
| Nov. 19 | 8.773                            | 1.480                              | 0.330                                    |
| Dec. 19 | 2.529                            | 1.652                              | 0.165                                    |
| Jan. 20 | 1.145                            | 0.613                              | 0.273                                    |
| Feb. 20 | 5.590                            | 1.000                              | 0.849                                    |
| Mar. 20 | 5.858                            | 0.761                              | 1.392                                    |
| Apr. 20 | 10.380                           | 0.260                              | 2.888                                    |
| May. 20 | 12.948                           | 1.968                              | 3.292                                    |
| June 20 | 18.167                           | 3.160                              | 3.277                                    |
| July 20 | 19.684                           | 0.368                              | 3.781                                    |
| Aug. 20 | 20.661                           | 0.039                              | 3.071                                    |
| Sep. 20 | 15.617                           | 1.880                              | 1.841                                    |
| Oct. 20 | 10.865                           | 4.052                              | 0.666                                    |
| Nov. 20 | 5.957                            | 0.620                              | 0.378                                    |
| Dec. 20 | 3.606                            | 1.084                              | 0.384                                    |

**Table S5.** Share of total discounted costs of poplar SRC production system.

| Item/Operation                | Discounted Costs (euros ha <sup>-1</sup> ) | Share   |
|-------------------------------|--------------------------------------------|---------|
| Poplar Rods                   | 1,667                                      | 16.59 % |
| Transportation of Poplar Rods | 440                                        | 4.38 %  |
| Land Agreement                | 2,582                                      | 25.70 % |
| Overhead                      | 2,039                                      | 20.29 % |
| Land Pre-Preparation          | 96                                         | 0.96 %  |
| Land Final-Preparation        | 38                                         | 0.38 %  |
| Planting                      | 481                                        | 4.79 %  |
| Maintenance                   | 456                                        | 4.54 %  |
| Fencing                       | 272                                        | 2.71 %  |
| Singling/Pruning              | 285                                        | 2.84 %  |
| Full-stem harvesting          | 786                                        | 7.82 %  |
| Log transport to plant        | 358                                        | 3.56 %  |
| Land reconversion             | 548                                        | 5.45 %  |
| Total                         | 10,048                                     | 100 %   |

**Table S6.** Share of total discounted costs of corn maize production system.

| Item/Operation                                                             | Discounted Costs (euros ha <sup>-1</sup> ) | Share   |
|----------------------------------------------------------------------------|--------------------------------------------|---------|
| Land Rent                                                                  | 683                                        | 4.81 %  |
| Land Pre-Preparation                                                       | 291                                        | 2.05 %  |
| Manure Spreading                                                           | 639                                        | 4.50 %  |
| Land Final-Preparation                                                     | 304                                        | 2.14 %  |
| Fertilizer (Diammon Phosphate 18 % N, 46 % P <sub>2</sub> O <sub>5</sub> ) | 457                                        | 3.22 %  |
| Fertilizing                                                                | 24                                         | 0.17 %  |
| Corn (Hybrid Seeds)                                                        | 2,990                                      | 21.07 % |
| Precision Seeding                                                          | 438                                        | 3.09 %  |
| Water                                                                      | 15                                         | 0.11 %  |
| Water-Transport                                                            | 32                                         | 0.23 %  |
| Herbicide (Intensity Level 1)                                              | 1,124                                      | 7.92 %  |
| Herbicide Application                                                      | 147                                        | 1.04 %  |
| Recording Weeds                                                            | 7                                          | 0.05 %  |
| Fertilizer (Calcium Ammonium Nitrate 27 % N)                               | 438                                        | 3.09 %  |
| Fertilizing                                                                | 28                                         | 0.20 %  |
| Harvesting                                                                 | 1,670                                      | 11.77 % |
| Transport of corn                                                          | 189                                        | 1.33 %  |
| Storage/Drying                                                             | 2,942                                      | 20.73 % |
| Fertilizer (Calcium Carbonate)                                             | 553                                        | 3.90 %  |
| Calcium Carbonate Spreading                                                | 34                                         | 0.24 %  |
| Land Recultivation (grubbing)                                              | 201                                        | 1.42 %  |
| Insurance (hail)                                                           | 121                                        | 0.85 %  |
| Services                                                                   | 24                                         | 0.17 %  |
| Labor costs fix                                                            | 840                                        | 5.92 %  |
| Total                                                                      | 14,191                                     | 100 %   |

**Table S7.** Share of total discounted costs of winter rye production system.

| Item/Operation                                                                            | Discounted Costs (euros ha <sup>-1</sup> ) | Share   |
|-------------------------------------------------------------------------------------------|--------------------------------------------|---------|
| Land Rent                                                                                 | 683                                        | 8.09 %  |
| Land Pre-Preparation                                                                      | 291                                        | 3.45 %  |
| Fertilizer (Diammon Phosphate 18 % P <sub>2</sub> O <sub>5</sub> , 10 % K <sub>2</sub> O) | 598                                        | 7.08 %  |
| Fertilizing                                                                               | 35                                         | 0.41 %  |
| Winter Rye Z-Seeds                                                                        | 864                                        | 10.23 % |
| Transport of Seeds                                                                        | 19                                         | 0.23 %  |
| Sowing (Rotary Harrows and Precision Seeder)                                              | 424                                        | 5.02 %  |
| Recording Weeds                                                                           | 7                                          | 0.08 %  |
| Water                                                                                     | 15                                         | 0.18 %  |
| Water Transport                                                                           | 32                                         | 0.38 %  |
| Herbicide (Intensity Level 1)                                                             | 741                                        | 8.78 %  |
| Growth Regulator (Intensity Level 1)                                                      | 74                                         | 0.88 %  |
| Herbicide Application                                                                     | 688                                        | 8.15 %  |
| Fertilizer (Calcium Ammonium Nitrate 27 % N)                                              | 28                                         | 0.33 %  |
| Fertilizing                                                                               | 52                                         | 0.62 %  |
| Fungicide (Intensity Level 1)                                                             | 496                                        | 5.88 %  |
| Fungicide Application                                                                     | 74                                         | 0.88 %  |
| Harvesting                                                                                | 1,134                                      | 13.43 % |
| Corn Transport                                                                            | 87                                         | 1.03 %  |

|                                     |              |              |
|-------------------------------------|--------------|--------------|
| Storage and Drying                  | 651          | 7.71 %       |
| Fertilizer (Calcium Carbonate)      | 553          | 6.55 %       |
| Calcium Carbonate Spreading         | 40           | 0.47 %       |
| Land Recultivation (grubbing, flat) | 201          | 2.38 %       |
| Land Recultivation (grubbing, deep) | 216          | 2.56 %       |
| Insurance (hail)                    | 61           | 0.72 %       |
| Services                            | 13           | 0.15 %       |
| Labor costs fix                     | 365          | 4.32 %       |
| <b>Total</b>                        | <b>8,442</b> | <b>100 %</b> |

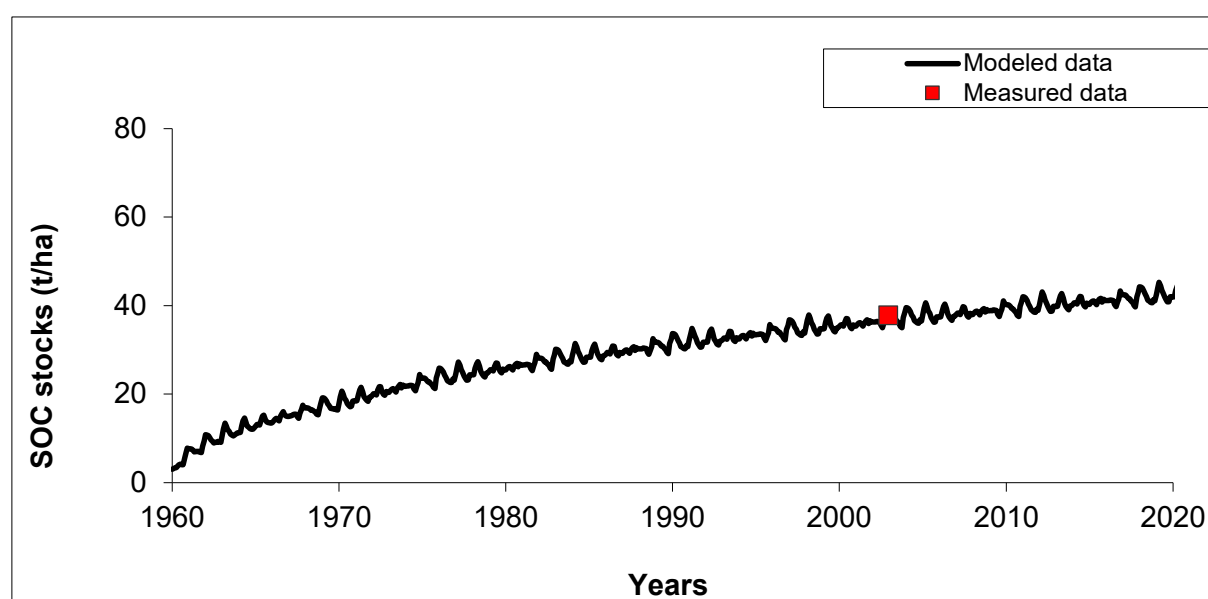

Figure S1. Calibration of RothC model for poplar SRC in Western Slovakia.

## References

1. Becker, R.; Röhricht, C.; Ruscher, K.; Jäkel, K. *Schnellwachsende Baumarten im Kurzumtrieb: Anbauempfehlungen*; Sächsisches Landesamt für Umwelt, Landwirtschaft und Geologie: Dresden, Germany, 2014.
2. Kröber, M.; Heinrich, J.; Wagner, P.; Schweinle, J. Ökonomische Bewertung und Einordnung von Kurzumtriebsplantagen in die gesamtbetriebliche Anbaustruktur. In *AGROWOOD. Kurzumtriebsplantagen in Deutschland und Europäische Perspektiven*; Bemann, A., Knust, C., Eds.; Weißensee Verlag: Weißensee, Germany, 2010; pp. 217–229.
3. Wagner, P.; Schweinle, J.; Setzer, F.; Kröber, M.; Dawid, M. *DLG-Standard zur Kalkulation einer Kurzumtriebsplantage (DLG-Merkblatt 372, Issue; DLG e. V. (Fachzentrum Land- und Ernährungswirtschaft): Frankfurt/Main, Germany, 2012.*
4. Dimitriou, I.; Rutz, D. *Sustainable Short Rotation Coppice: A Handbook*; Plus, S., Ed.; WIP Renewable Energies: München, Germany, 2015.
5. Faasch, R.J.; Patenaude, G. The economics of short rotation coppice in Germany. *Biomass Bioenergy* **2012**, *45*, 27–40. <https://doi.org/https://doi.org/10.1016/j.biombioe.2012.04.012>.
6. Schwieler, J.; Becker, G. Economics of poplar short rotation coppice plantations on marginal land in Germany. *Biomass Bioenergy* **2013**, *59*, 494–502. <https://doi.org/10.1016/j.biombioe.2013.10.020>.
7. Spinelli, R.; Magagnotti, N.; Lombardini, C.; Leonello, E.C. Cost-effective Integrated Harvesting of Short-Rotation Poplar Plantations. *BioEnergy Res.* **2021**, *14*, 460–468. <https://doi.org/10.1007/s12155-020-10163-2>.
8. Takáč, I.; Lazíková, J.; Rumanovská, L.; Bandlerová, A.; Lazíková, Z. The Factors Affecting Farmland Rental Prices in Slovakia. *Land* **2020**, *9*, 96. <https://doi.org/doi:10.3390/land9030096>.
9. OECD.Stat. Average Annual Wages. 2021. Available online: [https://stats.oecd.org/Index.aspx?DataSetCode=AV\\_AN\\_WAGE](https://stats.oecd.org/Index.aspx?DataSetCode=AV_AN_WAGE) (accessed on 10 November 2021).
